# Supplementary material for: Chemical interactions of mercury species and some transition and noble metals towards metallothionein (Zn7MT-2) evaluated using SEC/ICP-MS, RP-HPLC/ESI-MS and MALDI-TOF-MS
Source: Royal Society of Chemistry journal article supplement (doi:10.1039/c3mt00016h), 2013-01-01
Supplement: c3mt00016h.pdf [file c3mt00016h.pdf]

## Electronic Supplementary Information

**Chemical interactions of mercury species and some transition and noble metals towards metallothionein (Zn<sub>7</sub>MT-2) evaluated using SEC/ICP-MS and RP-HPLC/ESI-MS as well as MALDI-TOF-MS**

Ming Xu,<sup>a</sup> Limin Yang<sup>a</sup> and Qiuquan Wang<sup>\*,a,b</sup>

<sup>a</sup> Department of Chemistry & the Key Laboratory of Analytical Sciences, College of Chemistry and Chemical Engineering, Xiamen University, Xiamen 361005, China

<sup>b</sup> State Key Laboratory of Marine Environmental Science, Xiamen University, Xiamen 361005, China

\* Corresponding author: Qiuquan Wang; Tel: +86 592 2181796; Fax: +86 592 2187400; E-mail: qqwang@xmu.edu.cn

**Table S1. Operating Conditions of ICP-MS, ESI-IT-MS and MALDI-TOF-MS**

|                        |                                      |
|------------------------|--------------------------------------|
| ICP-MS parameters      |                                      |
| ICP RF Power           | 1100 W                               |
| Plasma gas flow        | 16 L Ar min <sup>-1</sup>            |
| Auxiliary gas flow     | 1.1 L Ar min <sup>-1</sup>           |
| Nebulizer gas flow     | 0.92 L Ar min <sup>-1</sup>          |
| Dwell time             | 100 ms                               |
| Reaction gas           | O <sub>2</sub>                       |
| Reaction gas flow rate | 0.6 mL min <sup>-1</sup>             |
| Rejection parameter q  | 0.45                                 |
| Rejection parameter a  | 0.0                                  |
| ESI-IT-MS parameters   |                                      |
| Scan type              | positive                             |
| Dry gas                | 8 L N <sub>2</sub> min <sup>-1</sup> |

|                         |            |
|-------------------------|------------|
| Dry temperature         | 300 °C     |
| Neb gas                 | 65 psi     |
| Capillary voltage       | -3400 V    |
| Endplate offset         | -500 V     |
| MALDI-TOF-MS parameters |            |
| Laser                   | 337 nm     |
| Mode                    | reflection |

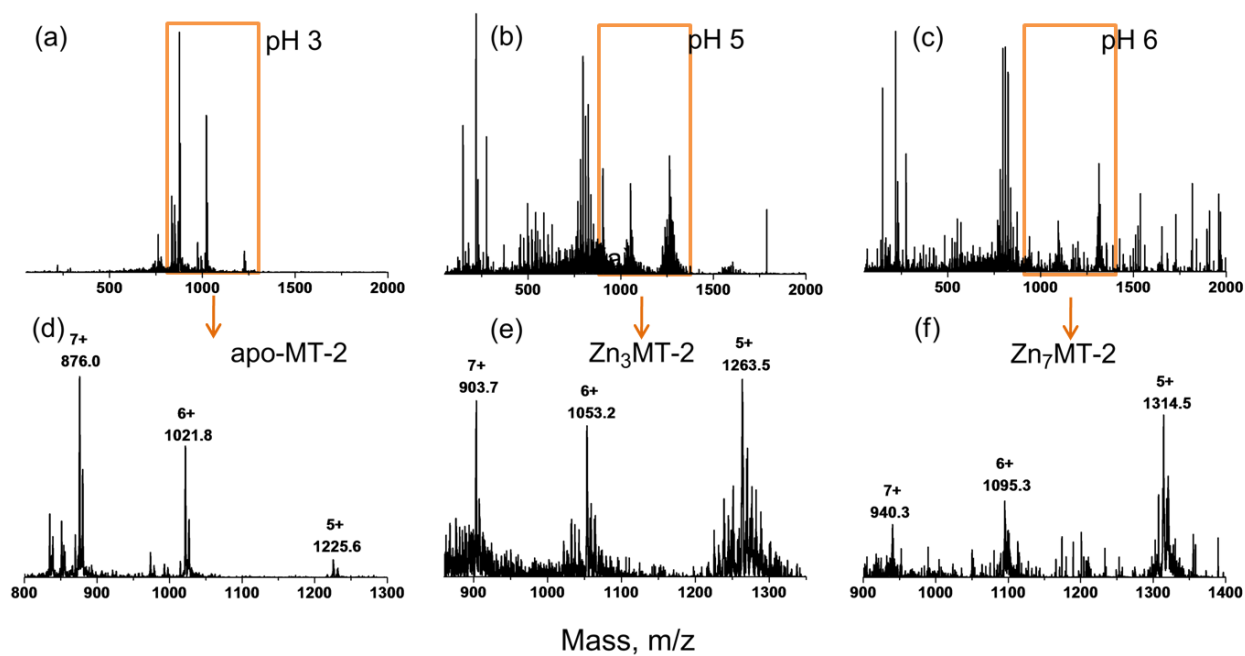

**Fig. S1** ESI-MS spectra of Zn<sub>7</sub>MT-2. (a) is full mass spectrum recorded at pH 3 and (d) is its enlarged mass spectrum from m/z 800 to 1300; (b) and (e) at pH 5; (c) and (f) at pH6.

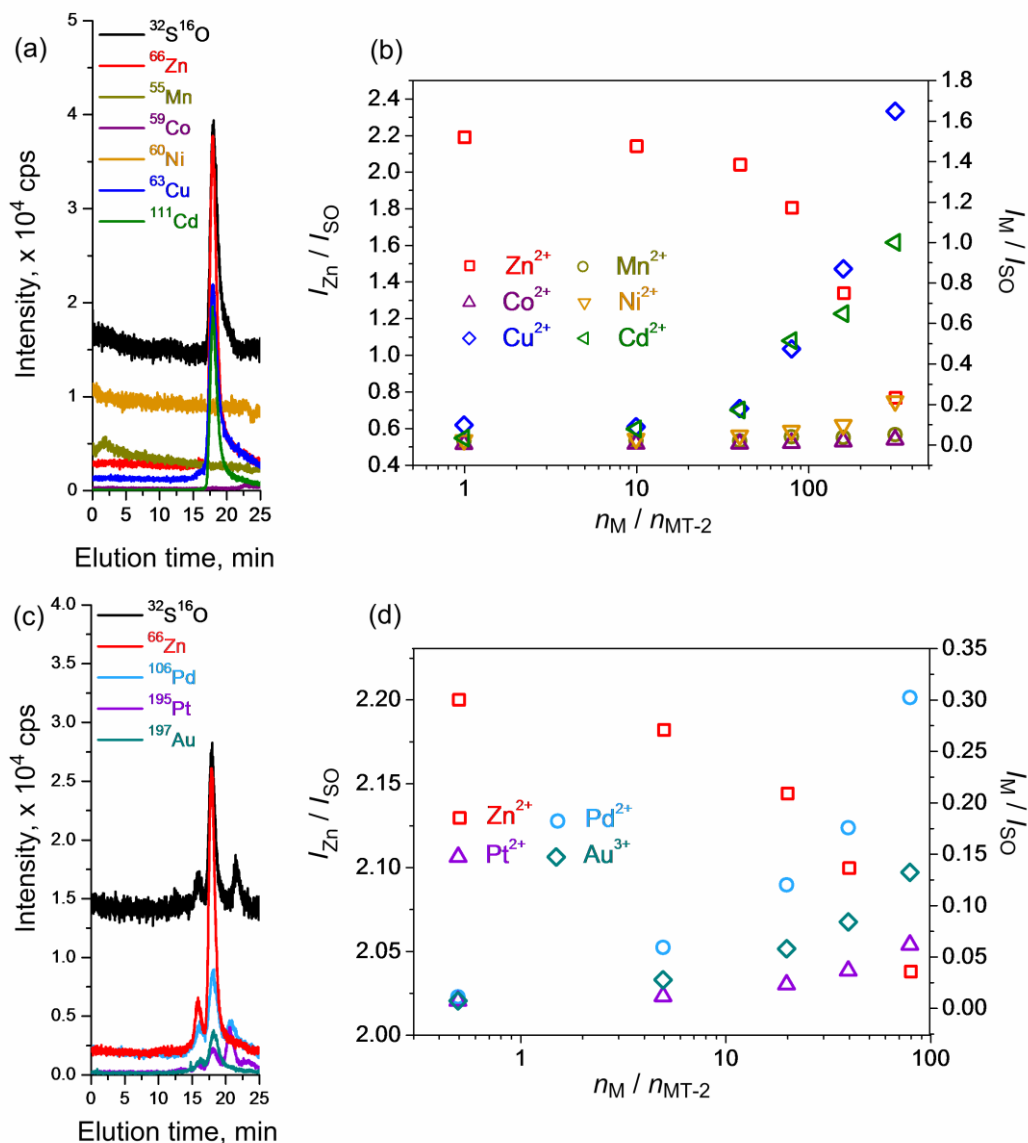

**Fig. S2** SEC/ICP-MS chromatograms of Zn<sub>7</sub>MT-2 reacting with “Mn, Co, Ni, Cu, Cd” (a) and “Pd, Pt, Au” (c) at  $n_M/n_{MT-2} = 100$ . Substitution processes of Zn<sup>2+</sup> in Zn<sub>7</sub>MT-2 by “Mn, Co, Ni, Cu, Cd” (b) and “Pd, Pt, Au” (d) at different molar ratios ( $n_M/n_{MT-2}$ ) under the physiological solution (pH 7.4).
